# Supplementary material
Source: PubMed Central journal article supplement (PMC7997730)

## Supplemental Data

### Federal Information Processing Standard (FIPS) County Code by Health Referral Region

| Health Referral Region                             | FIPS Codes                                                                                                                                                      |
|----------------------------------------------------|-----------------------------------------------------------------------------------------------------------------------------------------------------------------|
| Mayo Clinic in Florida                             | 12031, 12109, 13191, 13127, 13037, 13065, 13049, 13069, 13003, 13025, 13005, 13229                                                                              |
| Mayo Clinic in Rochester                           | 27037, 27043, 27131, 27169, 19189, 19195, 27139, 27109, 27045, 27047, 27147, 27161, 27099, 27039, 27157, 27049, 55011, 55093, 55091, 27013, 27103, 27079, 27165 |
| Mayo Clinic in Arizona                             | 04005, 04017, 04013, 04007, 04009, 04011, 04027, 04012, 04001, 04017, 49037                                                                                     |
| Mayo Clinic Health System – Southwest Wisconsin    | 27055, 55063, 55081, 55123, 55121                                                                                                                               |
| Mayo Clinic Health System – Northwest Wisconsin    | 55035, 55033, 55019, 55017, 55093, 55005                                                                                                                        |
| Mayo Clinic Health System – Southwest Minnesota    | 27013, 27103, 27015, 27063, 27091, 27079, 27161, 17165, 27043, 27143, 27165, 27033                                                                              |
| Mayo Clinic Health System – Southeastern Minnesota | 27037, 27043, 27131, 27169, 19189, 19195, 27139, 27045, 27047, 27147, 27161, 27099, 27157, 27049, 55011, 55093, 55091                                           |

## Mayo Clinic Serology Screening Program Operations Team

### Study Design Team Members:

|                      |                   |                     |
|----------------------|-------------------|---------------------|
| Ting, Henry          | Carter, Rickey E. | Beck, Scott A.      |
| Van Brunt, Nathan A. | Theel, Elitza S.  | Sampathkumar, Priya |
| Morice, William G.   | Thielen, Kent R.  | Farrugia, Gianrico  |

### Weekly Operations Team Members:

|                    |                      |                   |                       |
|--------------------|----------------------|-------------------|-----------------------|
| Van Brunt, Nathan  | Daugherty, Liz       | Ryan, Joe         | Dalbello, Andrew      |
| Griffin, Tom       | Kruisselbrink, Steve | Ohnstad, Connie   | Rickard, Twyla        |
| Johnson, Sharon    | Novak, Deb           | Hill, Brandon     | Solak, Kari           |
| Button, Brian      | Mitchell, Shawn      | Cozine, Daniel    | Blanchfield, Lorrie   |
| Hargrett, Tobia    | Moore, Jordan        | Buckmeier, Jason  | Vaneps, Aaron         |
| Dhanorker, Atul    | Smith, Windell       | Cunningham, Ave   | Block, Darci          |
| Schilling, Jason   | Maixner, Aaron       | Winder, Tonya     | Desilva, Jeff         |
| Kothari, Atul      | McIntosh, James      | Nelson, Elissa    | Hagen Moe, Deb        |
| Unverzagt, Laura   | Kirby, Sharon        | Day, Leland       | Swanson, Laura        |
| Phelps, Brad       | Schmidt, Tom         | Chafer, Amy       | Lewis, Irene          |
| Markham, Kathy     | Mundell, William     | Basel, Dustin     | Bauer, Laurie         |
| Nett, Ryan         | Tangirala, Kalyan    | Fisher, Pam       | Roloff, Devin         |
| Fleming, Johnell   | Ray, Frank           | Wohlfiel, Sherri  | Minter Baerg, Melissa |
| von Bormann, Georg | Carter, Rickey       | Turner, Nathan    | Giese, Jennifer       |
| Boon, Ashton       | Henckel, John        | Shedenhelm, Heidi | Briske, Jen           |
| Joyce, Diane       | Jones, Jacque        | Killian, Chris    | Counselman, Shannon   |
| Stewart, Leana     | Bell, Natalie        | Christina, Debra  | Beito, Elaine         |
| Bicknese, Brianna  | Larson, Darlene      | Morrison, Laura   | Kittel, Lynn          |
| Kang, Nicole       | Gaul, Megan          | Lee, Joshua       | Mattson, Angela       |
| Marzolf, Teresa    | Brugger, Cheryl      | Lorentz, Paul     | Fox, Janelle          |
| Wannarka, Emily    | Backus, Linda        | Stewart, Kent     |                       |

### MC Employee Serology Testing Systems Meeting Members:

|                     |                  |                  |                  |
|---------------------|------------------|------------------|------------------|
| Bauer, Laurie       | Moore, Jordan    | Block, Darci     | Buckmeier, Jason |
| Counselman, Shannon | Cozine, Daniel   | Cunningham, Ave  | Daugherty, Liz   |
| Desilva, Jeff       | Hargrett, Tobia  | McIntosh, James  | Novak, Deb       |
| Vaneps, Aaron       | Schilling, Jason | Unverzagt, Laura | Stewart, Leana   |
| Christina, Debra    | Bell, Natalie    | Bicknese, Briana | Morrison, Laura  |
| Larson, Darlene     | Kittel, Lynn     | Schmidt, Tom     | Nett, Ryan       |
| Dahl, Josh          | Basel, Dustin    |                  |                  |

### Employee Testing Enterprise Coordination Team:

|                       |                      |                               |
|-----------------------|----------------------|-------------------------------|
| Didehban, Roshanak    | Poe, John D.         | Beck, Scott A.                |
| Anderson, Bryan L.    | Joyce, Diane E.      | Wanjiru, AnneRose             |
| Frederick, Ryannon K. | Morrey, Michael A.   | Daugherty, Elizabeth A. (Liz) |
| Boon, Ashton L.       | Ryan, Michael J.     | Storino, Colleen B.           |
| Knutson, Aric J.      | Thiemann, Kay M      | Fraser, Cathryn H. (Cathy)    |
| Slegh, Keri A.        | Glenn, Sean W.       | Caine, Natalie A.             |
| Hasse, Christopher H. | Van Brunt, Nathan A. |                               |

**Employee Testing Data Analysis Team:**

|                    |                     |                    |
|--------------------|---------------------|--------------------|
| Carter, Rickey E.  | Johnson, Patrick W. | Bews, Katherine A. |
| Domnick, Robert A. |                     |                    |

### Supplemental Figure 1. Participation rates for the Mayo Clinic Serology Screening Program

This figure reports the participation rates of healthcare personnel in the Mayo Clinic Serology Screening Program. Panel A reports the overall participation rate of the 81,113 healthcare personnel studied. Panel B breaks the results down by the participant's home state. Panels C and D break the results down by age groups and sex, respectively. Percentages reported in each bar is the observed participation rate. For each category, the total sample size is also given.

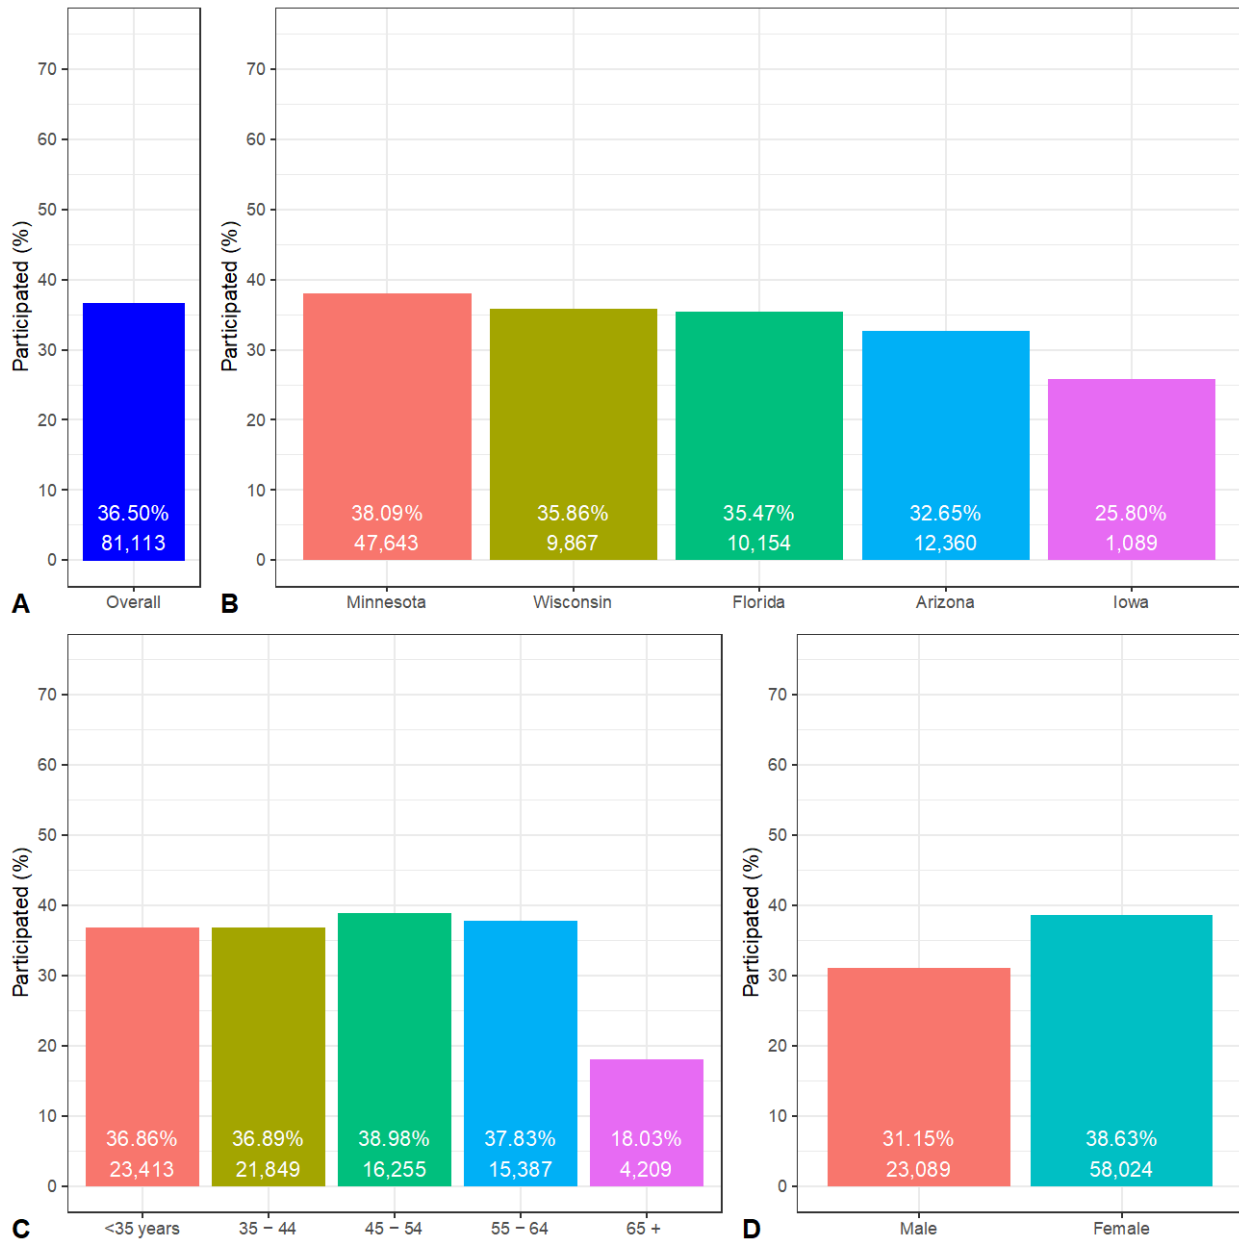

Supplement: mmc2.pdf [file mmc2.pdf]
